# Supplementary material
Source: Springer Nature journal article supplement (https://www.springermedizin.de/resource/supplementary/12889_2009_2367_MOESM6_ESM.pdf/9485556)

## Outcome

attention (5 studies)

energy (5 studies)

tranquility (7 studies)\*

anxiety (6 studies)\*

anger (8 studies)

fatigue (4 studies)

sad/depressed (5 studies)

systolic bp (5 studies)

diastolic bp (4 studies)

cortisol (4 studies)

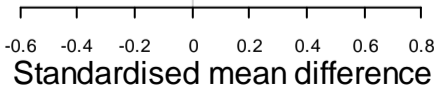

Supplement: MOESM6 [file 9485556]
